# Supplementary material
Source: Springer Nature journal article supplement (https://www.springermedizin.de/resource/supplementary/12958_2009_509_MOESM2_ESM.pdf/9568176)

**A**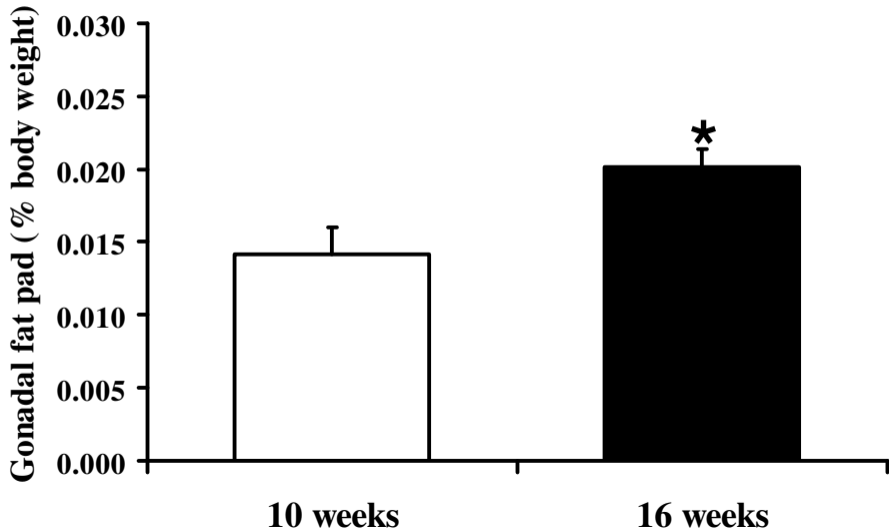**B**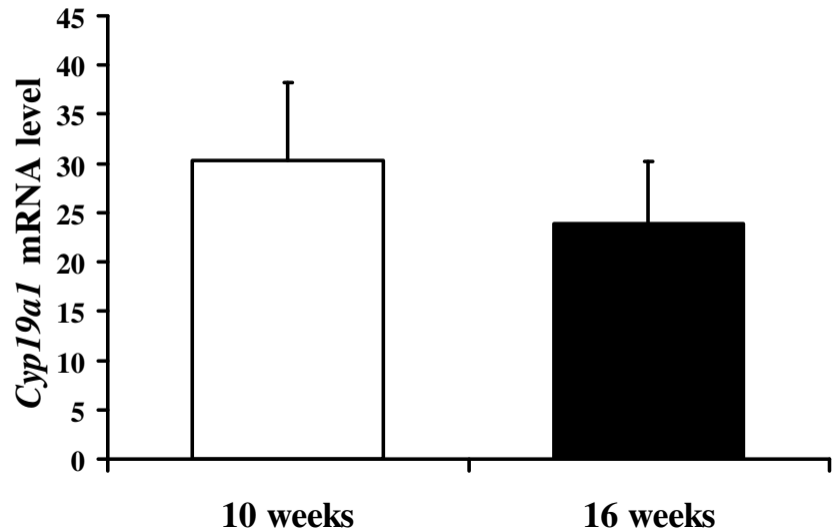

Supplement: MOESM2 [file 9568176]
